# Supplementary material for: Prenatal and Postnatal Anxiety and Depression in Mothers during the COVID-19 Pandemic
Source: MDPI journal article supplement (doi:10.3390/jcm10143193), 2021-07-20
Supplement: s1 [file s1]

**Figure S1:** Responses to the statements of EPDS.

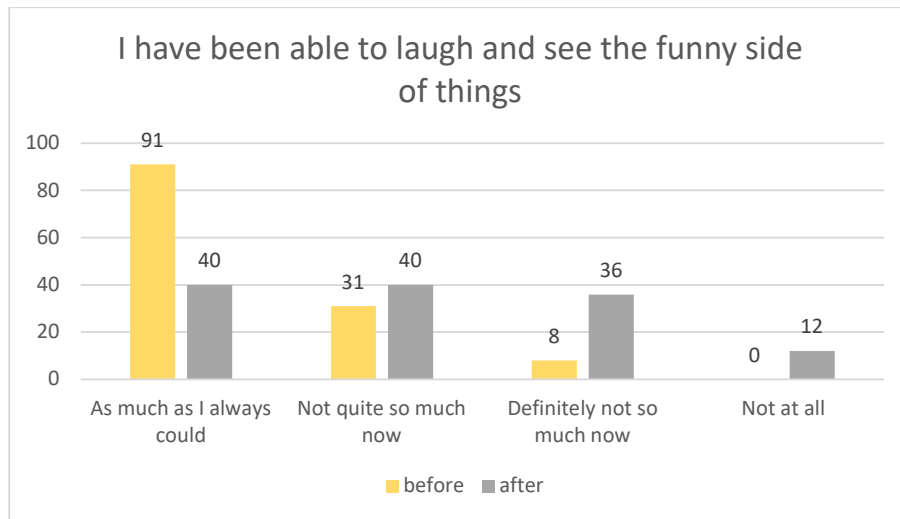

**Figure S1a.** I have been able to laugh and see the funny side of things.

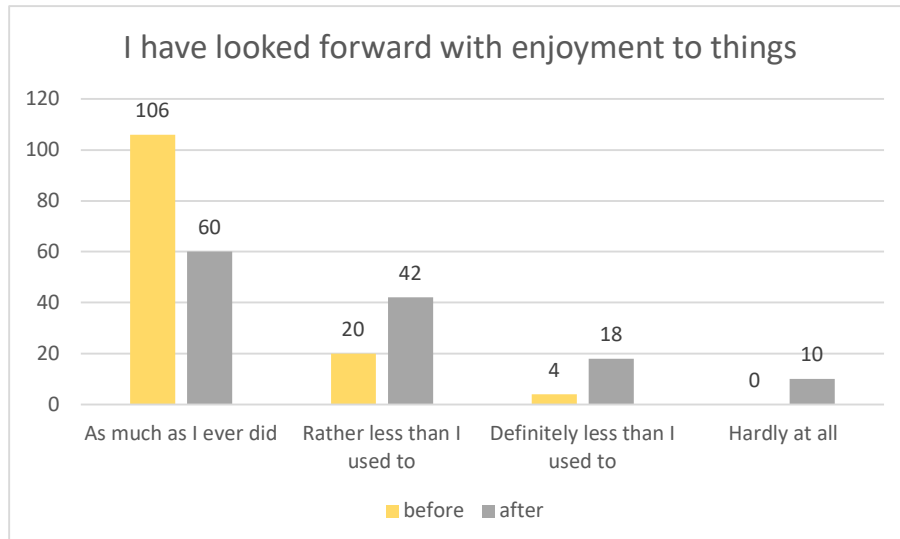

**Figure S1b.** I have looked forward with enjoyment to things.

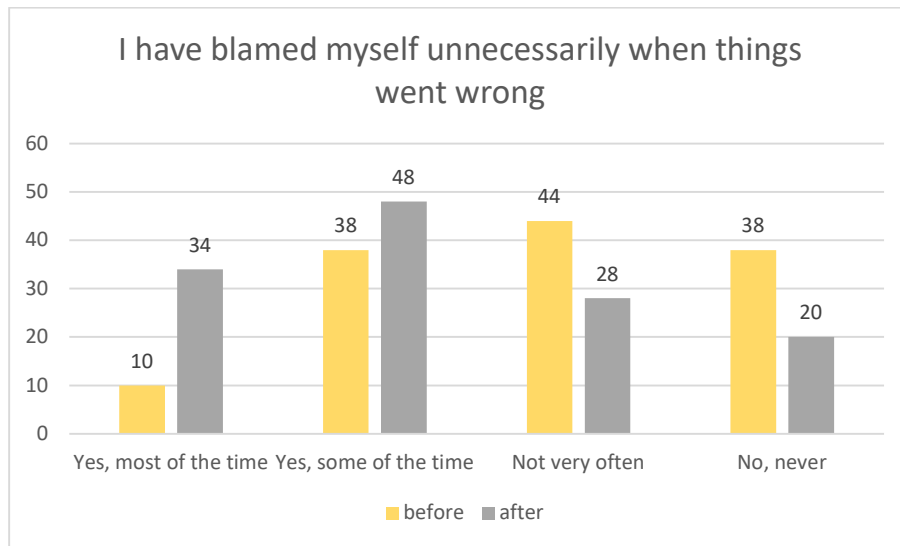

**Figure S1c.** I have blamed myself unnecessarily when things went wrong.

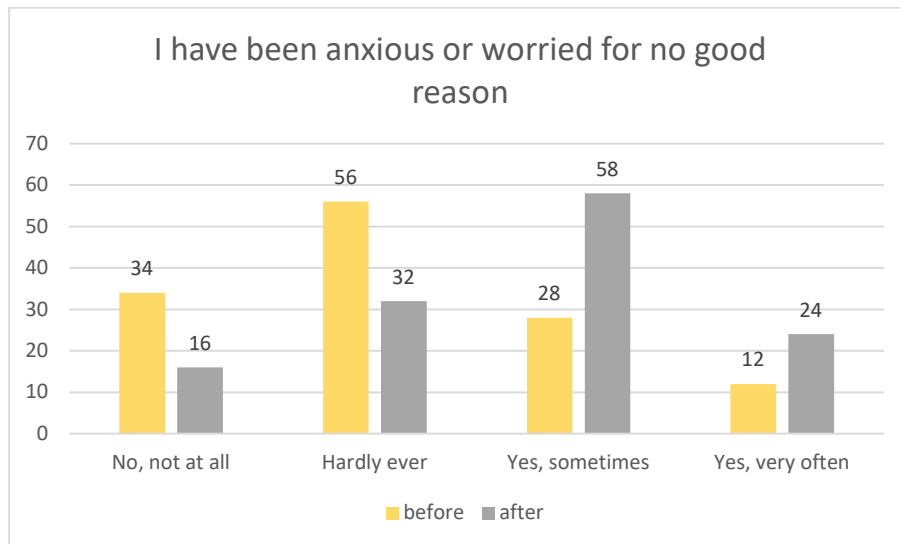

**Figure S1d.** I have been anxious or worried for no good reason.

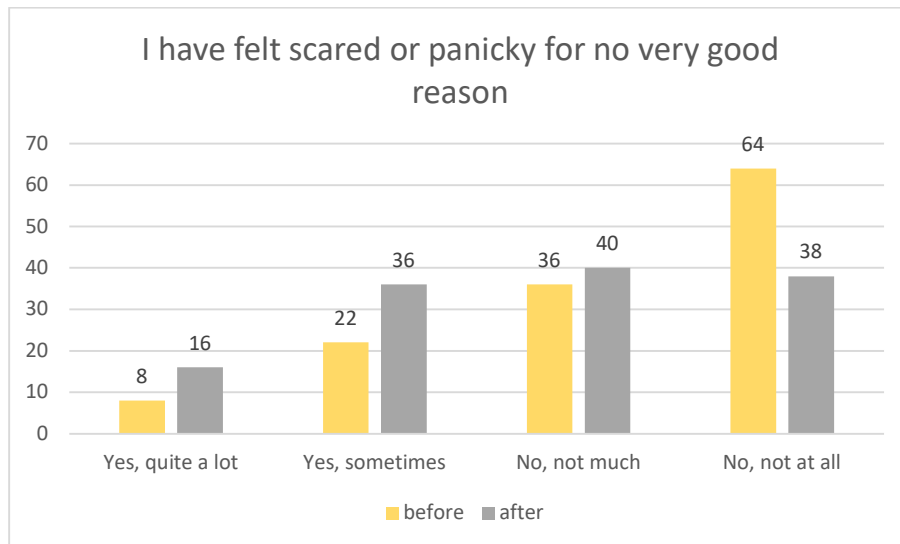

**Figure S1e.** I have felt scared or panicky without a good reason.

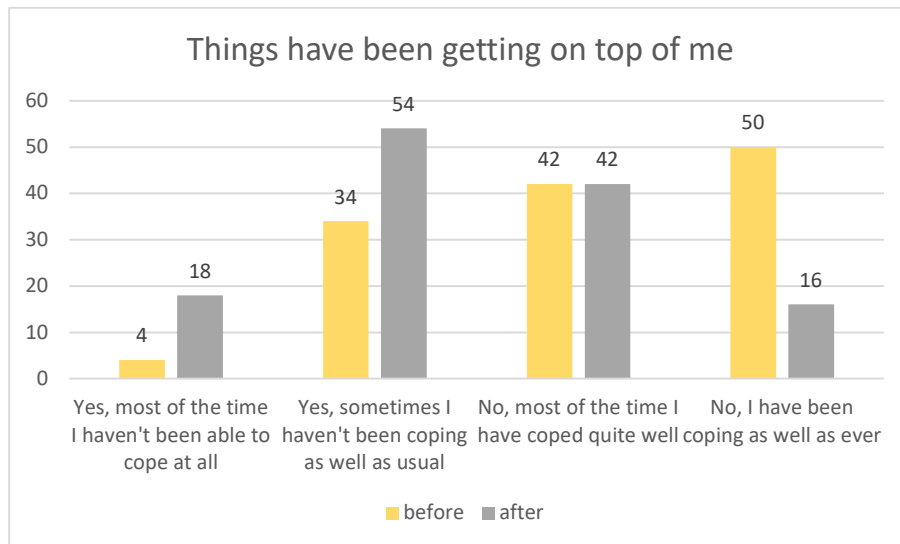

**Figure S1f.** Things have been getting on top of me.

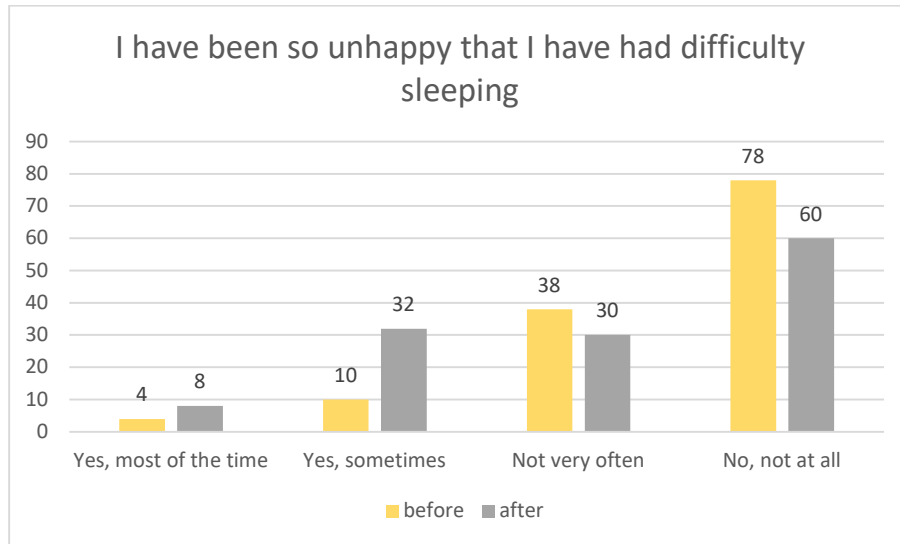

**Figure S1g.** I have been so unhappy that I have had difficulty sleeping.

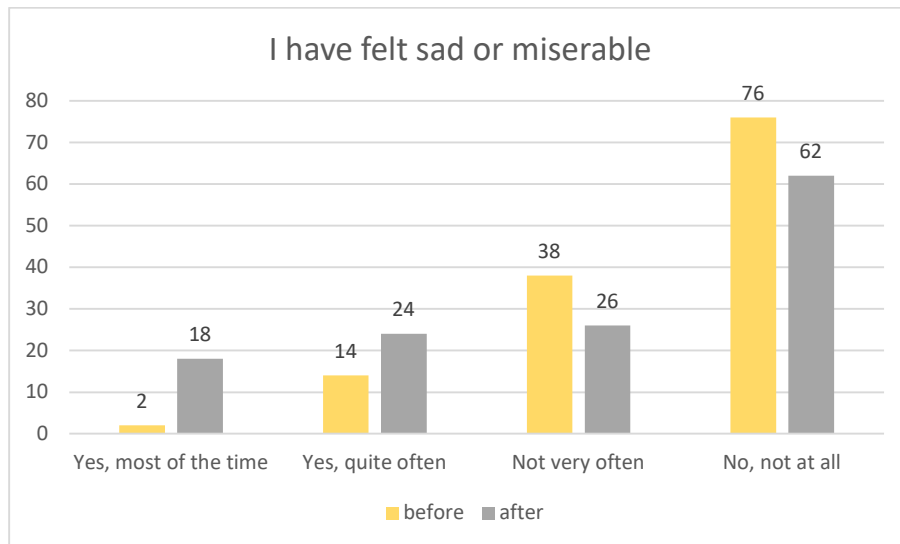

**Figure S1h.** I have felt sad or miserable.

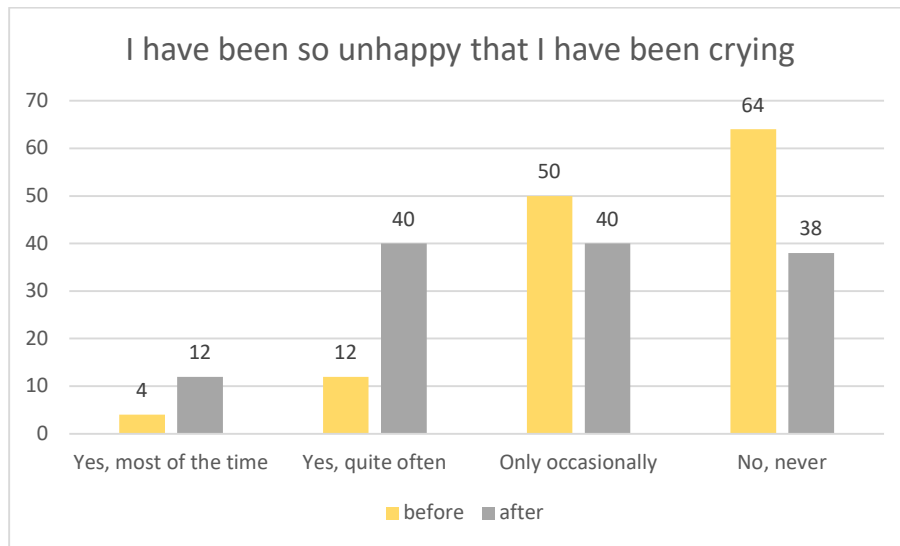

**Figure S1i.** I have been so unhappy that I have been crying.

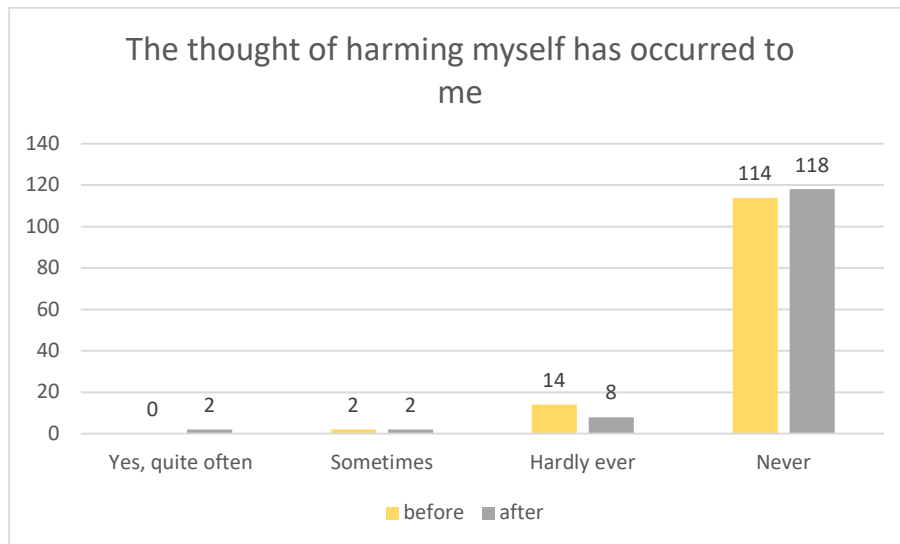

**Figure S1j.** The thought of harming myself has occurred to me.

**Figure S2:** Responses to the statements of GAD7.

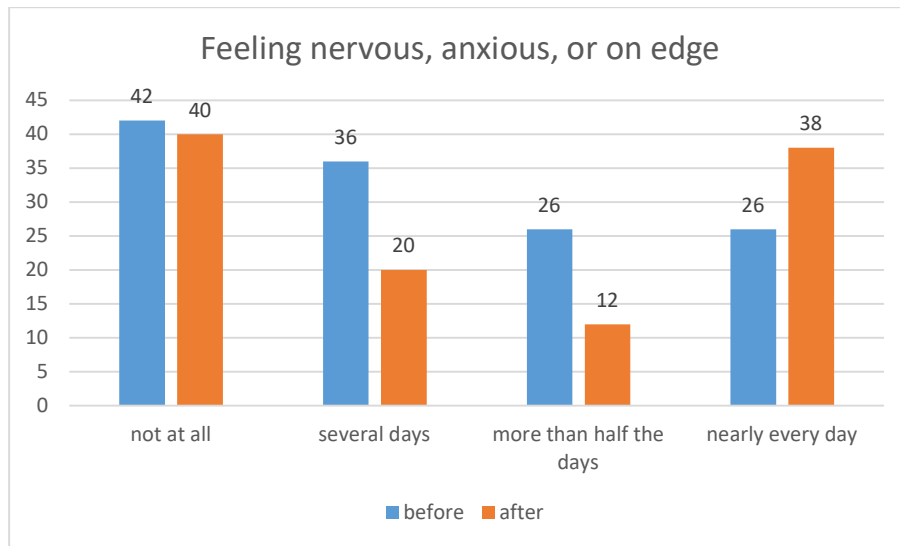

**Figure S2a.** Feeling nervous, anxious, or on edge.

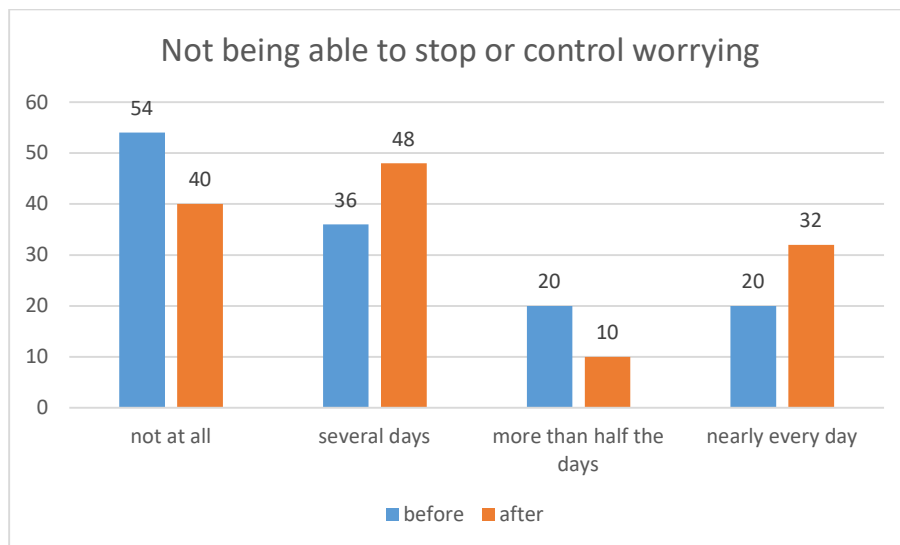

**Figure S2b.** Not being able to stop or control worrying.

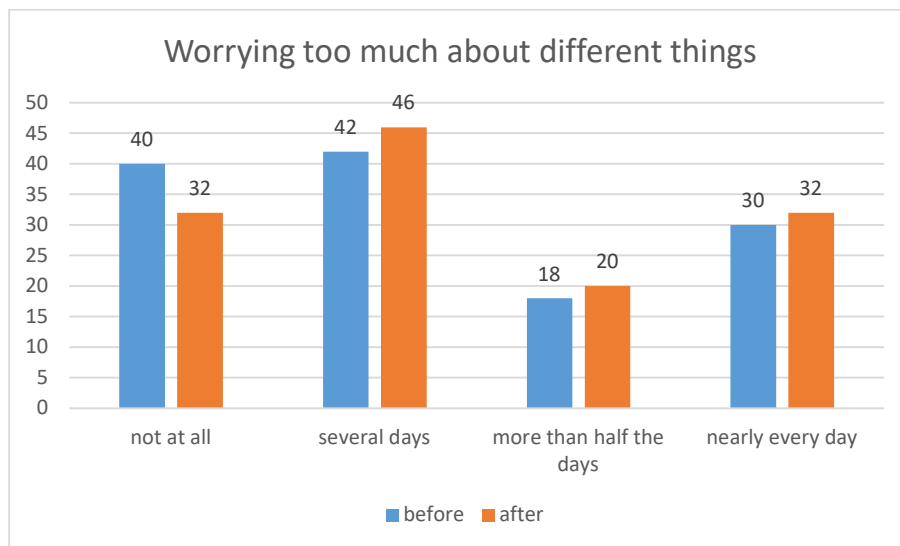

**Figure S2c.** Worrying too much about different things.

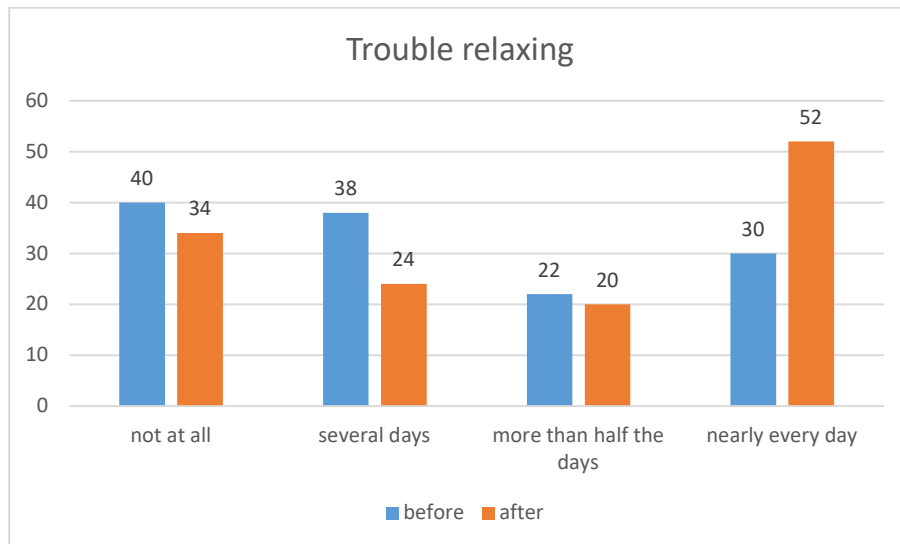

**Figure S2d.** Trouble relaxing.

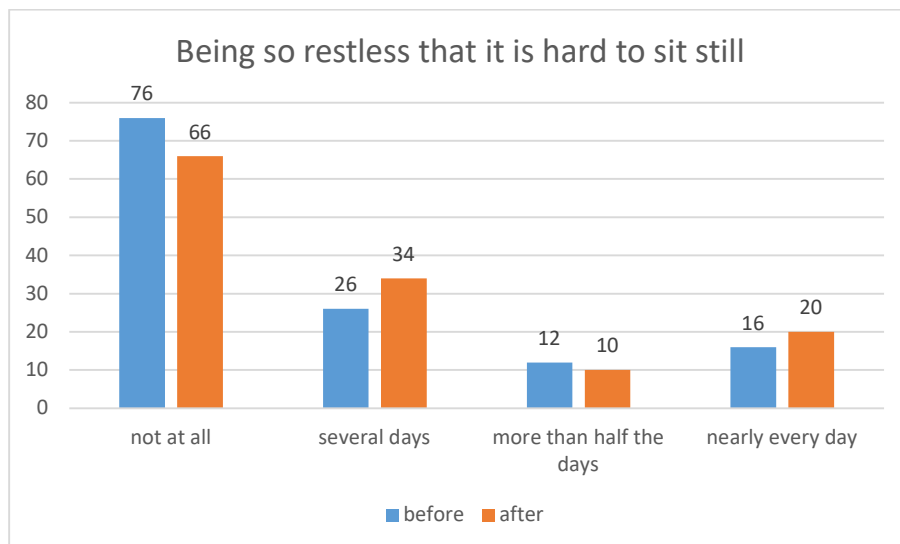

**Figure S2e.** Being so restless that it is hard to sit still.

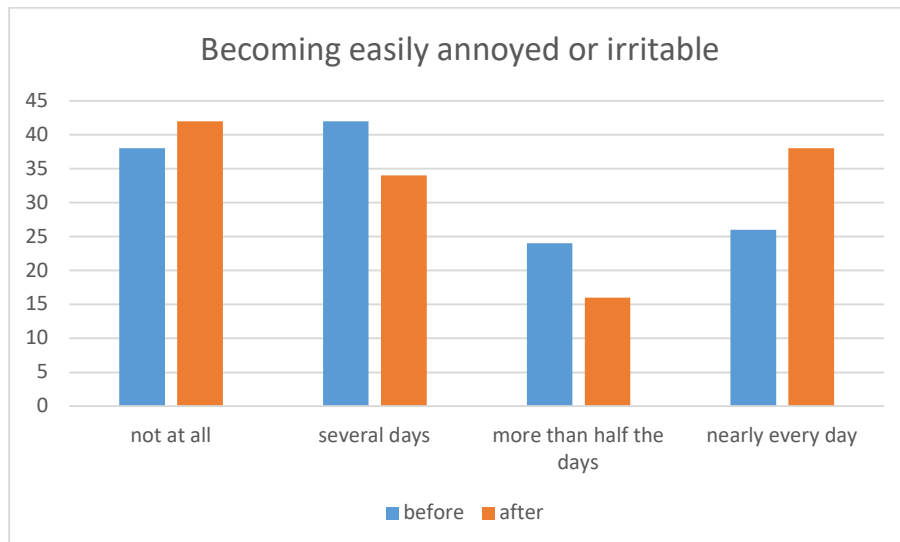

**Figure S2f.** Becoming easily annoyed or irritable.



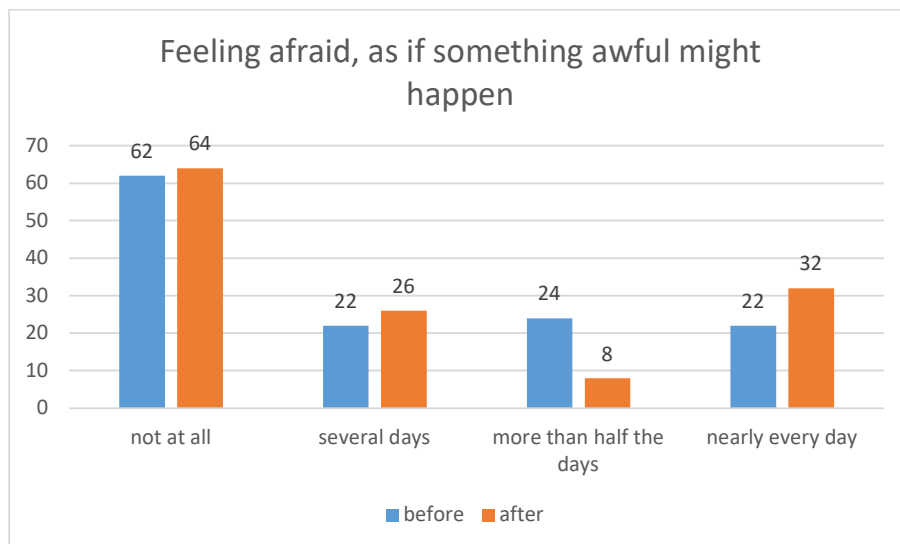

**Figure S2g.** Feeling afraid, as if something awful might happen.
